# Supplementary material for: Interaction proteome of human Hippo signaling: modular control of the co‐activator YAP1
Source: Mol Syst Biol. 2013 Dec 20;9:713. doi: 10.1002/msb.201304750 (PMC4019981; doi:10.1002/msb.201304750)
Supplement: Supplementary file 3 — Supplementary Figure 3 [file MSB-9-1-713-s03.pdf]

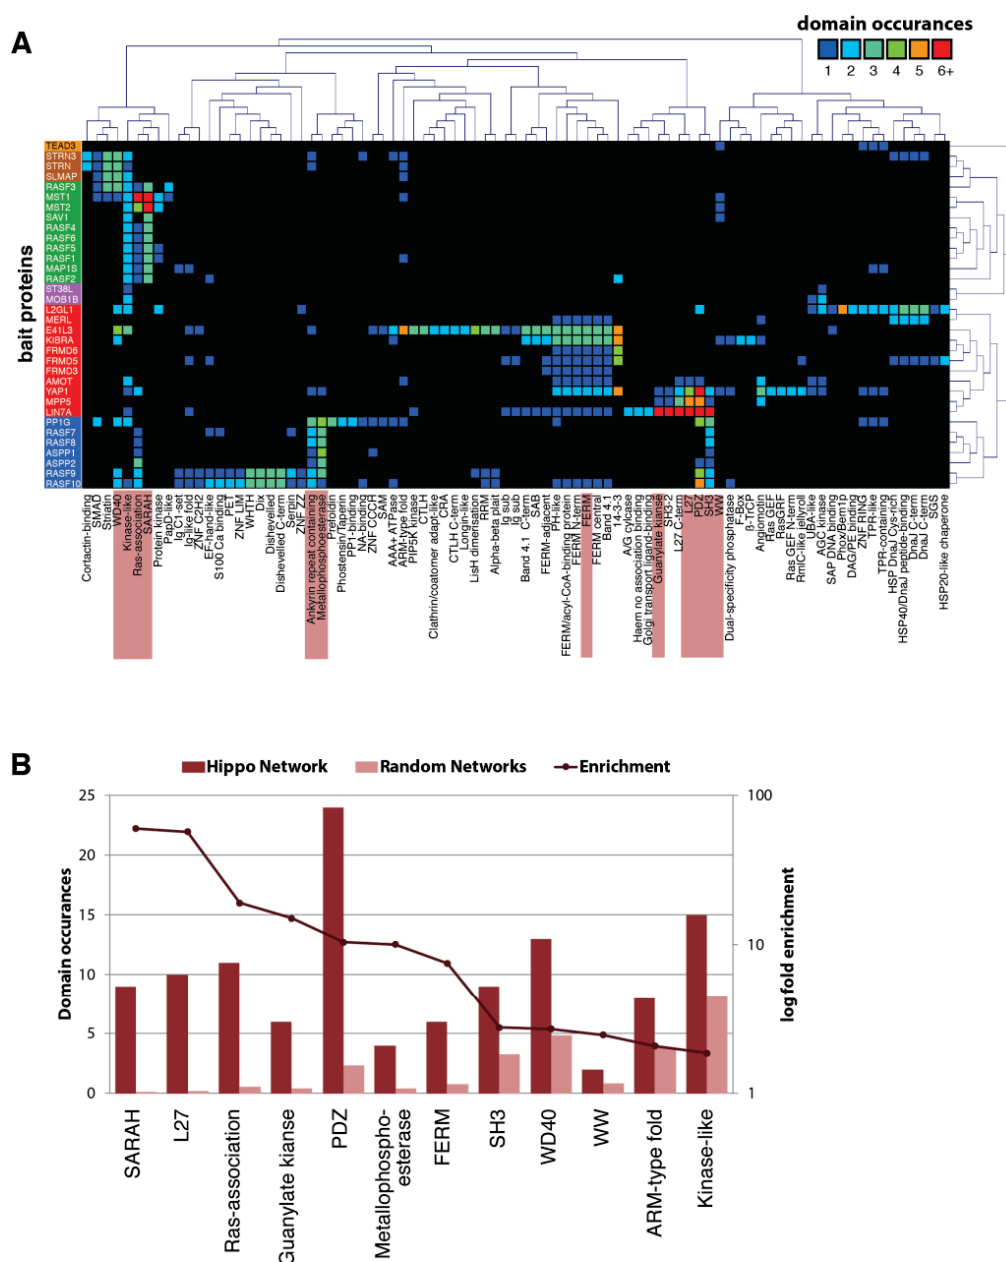

**Supplementary Figure S3: Domain distributions and enrichment of identified Hpo pathway proteins.**

(A) Bait proteins and domains identified in the respective bait purification were hierarchically clustered by an uncentered Pearson correlation algorithm. (B) Enrichment of a subset of prominent domains compared to random protein networks of the same size. 270 proteins were sampled randomly 10,000 times from the canonical human Swiss-Prot database (complete proteome dataset) and used to calculate the domain enrichment in the presented AP-MS data.
